# Supplementary material for: Janus nanoplates, -bowls, and -cups: controlling size and curvature via terpolymer/homopolymer blending in 3D confinement
Source: Royal Society of Chemistry journal article supplement (doi:10.1039/d3nr02902f), 2023-01-01
Supplement: d3nr02902f1.pdf [file d3nr02902f1.pdf]

Electronic Supplementary Information

**Janus nanoplates, -bowls, and -cups: Controlling size and curvature via terpolymer/homopolymer blending in 3D confinement**

Suna Azhdari<sup>1</sup>, Yorick Post<sup>1</sup>, Manuel Trömer<sup>1</sup>, Deniz Coban<sup>1</sup>, Giada Quintieri<sup>1</sup>, André H. Gröschel<sup>\*1,2</sup>

<sup>1</sup> Institute for Physical Chemistry and Center for Soft Nanoscience (SoN), University of Münster, Corrensstraße 28-30, 48149 Münster (Germany)

<sup>2</sup> Polymer materials for energy storage (PES), Bavarian Centre for Battery Technology (BayBatt) and Bavarian Polymer Institute (BPI), University of Bayreuth, Universitätsstr. 30, 95448 Bayreuth, (Germany)

\*Corresponding author: [andre.groeschel@uni-bayreuth.de](mailto:andre.groeschel@uni-bayreuth.de)

**Supporting Movies:**

**Supporting Video 1:** TEM tilt series of JNB. The video shows a JNB on a carbon Cu grid with 10 nm gold nanoparticles. The tilt series was recorded from -60 to +60 ° in 2-degree steps.

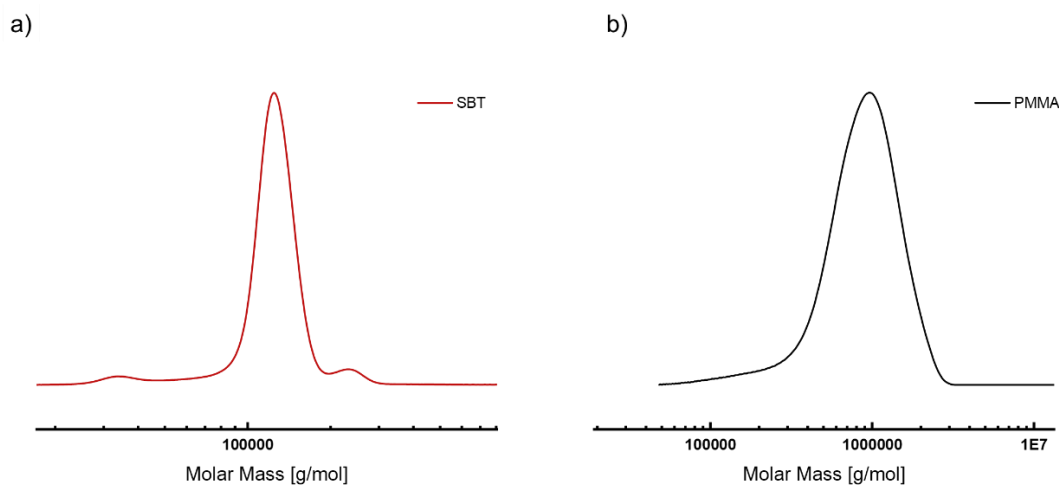

**Fig. S1:** GPC traces of SBT and *h*PMMA.



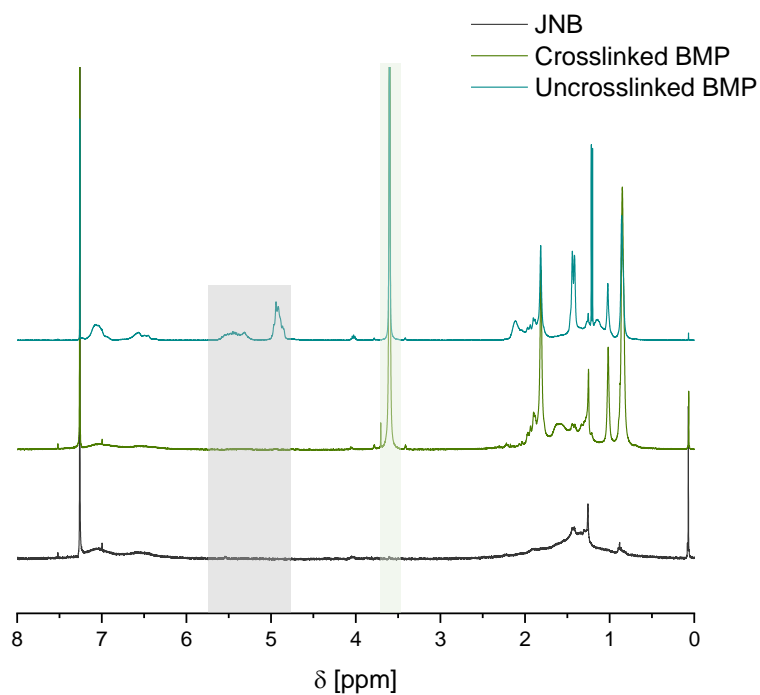

**Fig. S4:** NMR analysis of the crosslinking of the PB lamellae in BMP and subsequent redispersion of JNB. Successful crosslinking was confirmed by disappearance of the PB vinylic peaks at 4.8-5.7 ppm. Similarly, disappearance of the peak at 3.60 ppm confirms the removal of the *h*PMMA cap.

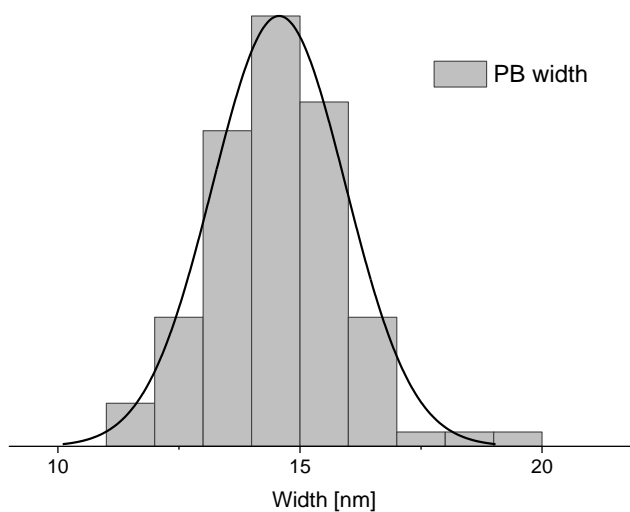

**Fig. S5:** Size distribution of PB lamellar width fitted with a gaussian distribution.

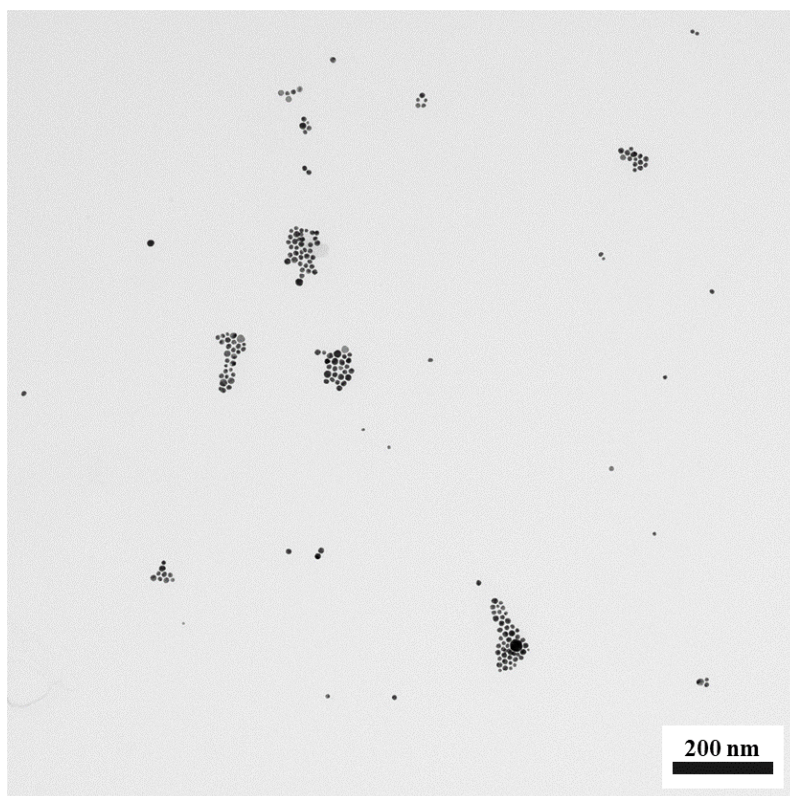

**Fig. S6:** TEM Characterization of positively charged Au-NPs.

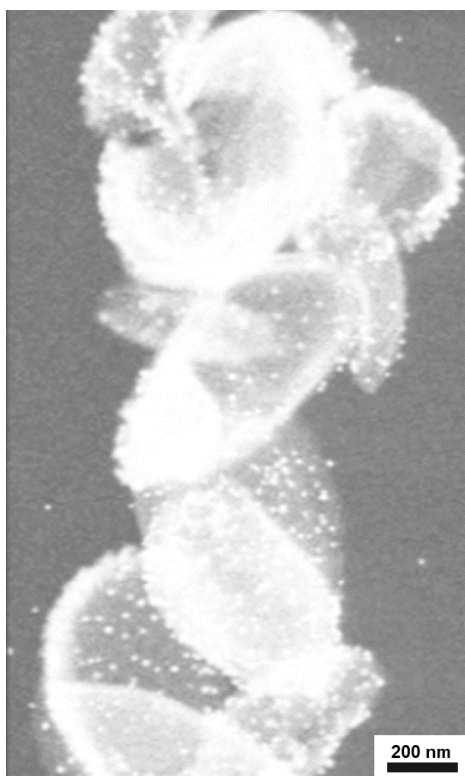

**Fig. S 7:** STEM Characterization of JNB with AuNPs.

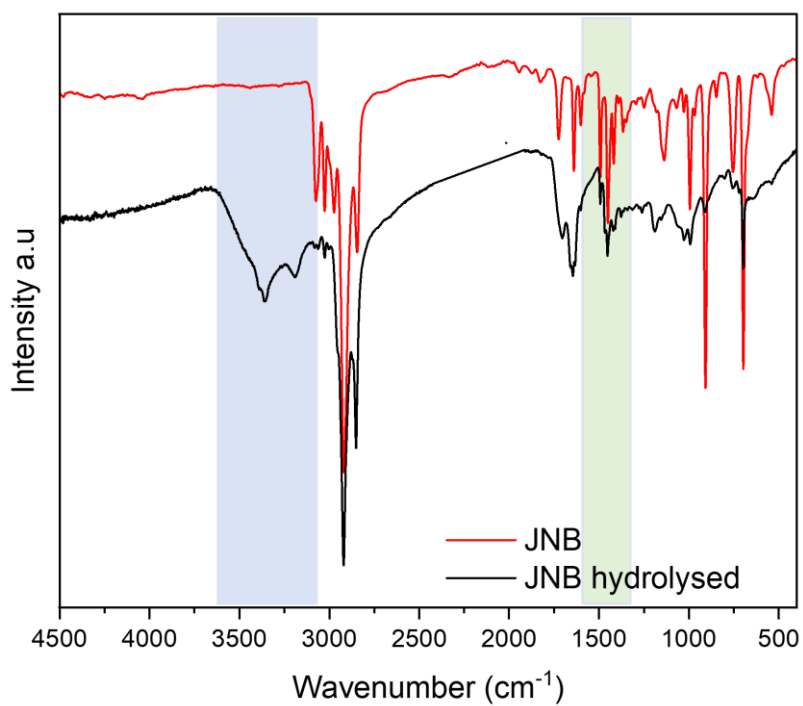

**Fig. S8:** IR-spectra of JNB and hydrolyzed JNB.

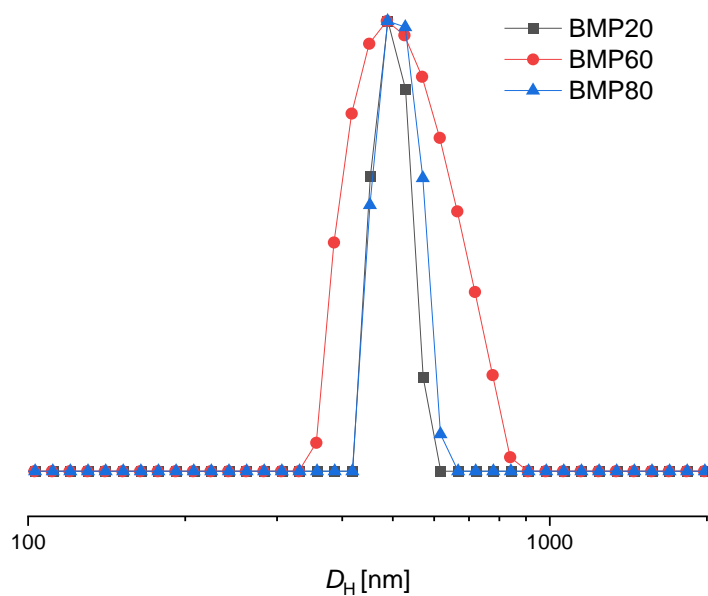

**Fig. S9:** DLS of BMP20,60, and 80.

20%

60%

80%

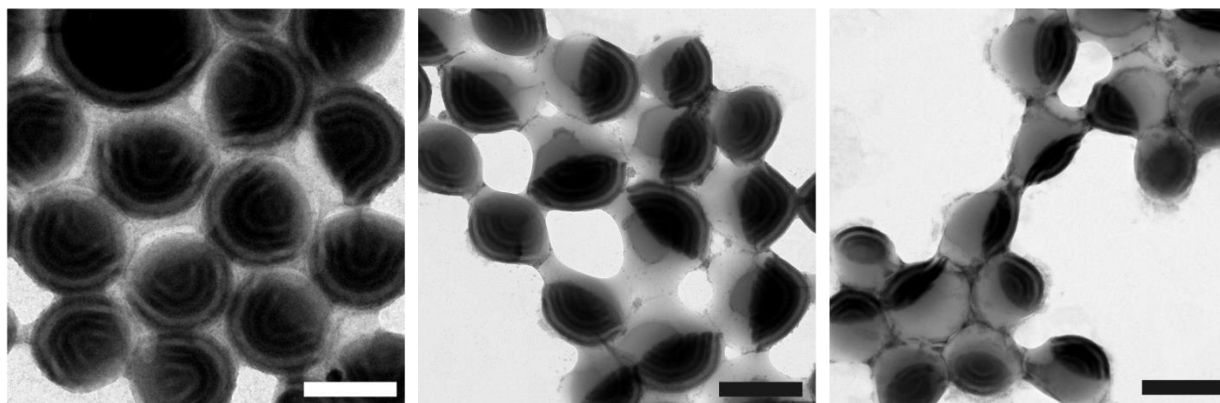

**Fig. S10:** TEM images of SBT microparticles, BMP20, BMP60, BMP80, with  $d_{\text{pore}} = 0.5 \mu\text{m}$ . (the PB block was stained with  $\text{OsO}_4$ ; scalebars are 500 nm.)

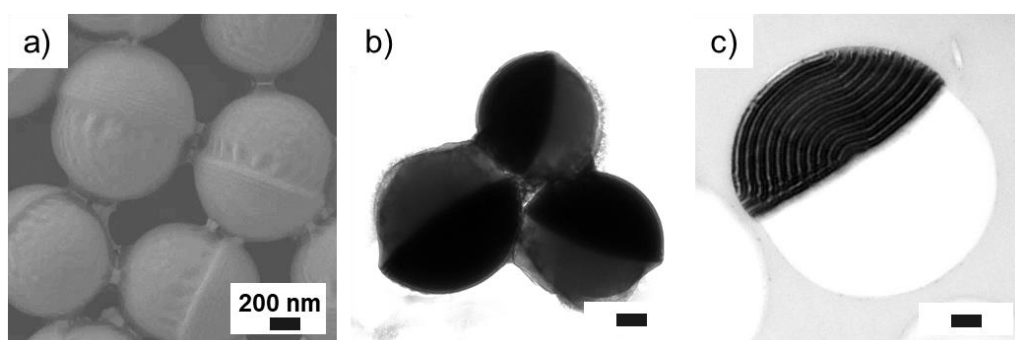

**Fig. S11: BMP60 from a  $d_{\text{pore}} = 2.0 \mu\text{m}$ .** a, b) TEM and SEM image of microparticles and c) TEM cross-section. (For TEM, the PB block was stained with  $\text{OsO}_4$ ; scalebars are 200 nm.)
